# Supplementary material
Source: PubMed Central journal article supplement (PMC5667921)
Supplement: NIHMS914129-supplement-supplement_1.pdf [file NIHMS914129-supplement-supplement_1.pdf]

**a**

|       |     |                                                              |     |
|-------|-----|--------------------------------------------------------------|-----|
| Human | 23  | EEITPVVSIAYKVLVFPKGRWVLTCCAPQPPPPITYSLCGTKNIKVAKKVVKTHEPAS   | 82  |
|       |     | EE T ++IAYKVLV+P+ R VLITC AP+ PITYSL ++ I VAKKVV PAS         |     |
| Mouse | 19  | EEQTEGITIAYKVLVYPQSRRLITCDAPEASQPITYSLLASRGILVAKKVVHDSVPAS   | 78  |
| Human | 83  | FNLNVTLKSSPDLLTYFCWASSTSGAHVDSARLQMHWELWSKPVSELNFTLQDRGAGP   | 142 |
|       |     | FN+N+T+KSSPDLLTY C A+S SG + S+RLQM+ ELW+KPVS+L+A+F L+ +GP    |     |
| Mouse | 79  | FNINITIKSSPDLLTYSCQATSNSGTYPSSRLQMYQELWAKPVSQLQADFVLRHGDSGP  | 138 |
| Human | 143 | RVEMICQASSGSPITNSLIGKDGQVHLQQRPCHRQPANFSFLPSQTSDFWFCQAANNAN  | 202 |
|       |     | VE+ C ASSGSPIT L+G G+V QQRP H +PANFS SQT+ WF C+A N+          |     |
| Mouse | 139 | TVELSCLASSGSPITYRLVGNNGGRVLAQQRPLHGKPANFSLPLSQTTGWFQCEAENDVG | 198 |
| Human | 203 | VQHSALTVVP 212                                               |     |
|       |     | V SA +P                                                      |     |
| Mouse | 199 | VDSSARIPLP 208                                               |     |

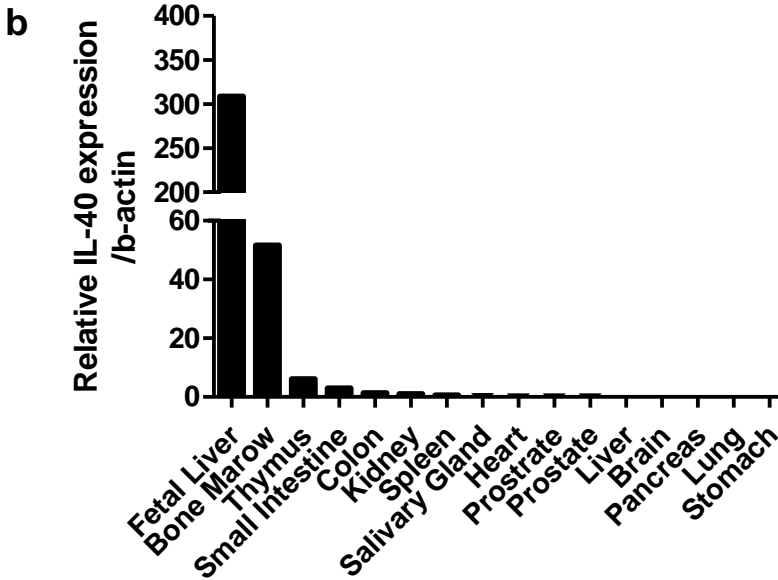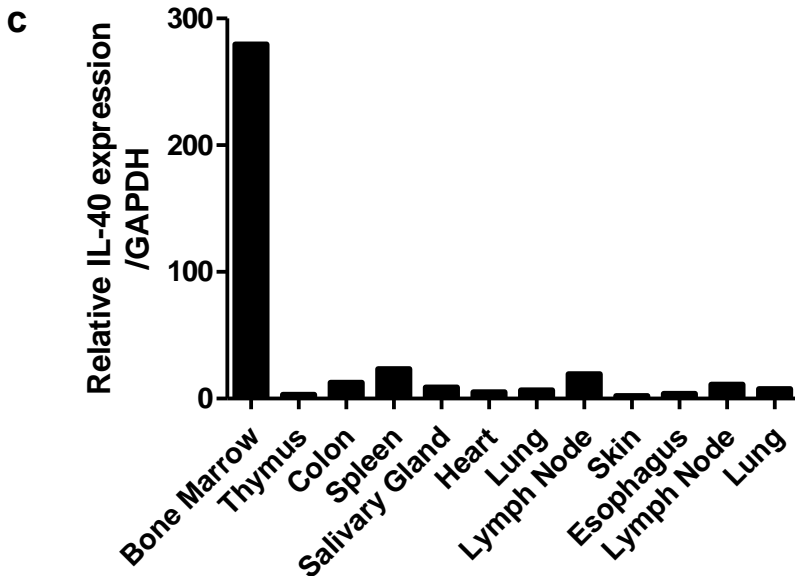

**Supplementary Figure S1. IL-40 expression in mouse and human.** IL-40 expression is conserved in human and mice (72% homology at the amino acid level). **(a)** Human and mouse primary protein structure alignment. **(b)** qPCR expression pattern of human tissues. **(c)** qPCR expression pattern of mouse tissues.

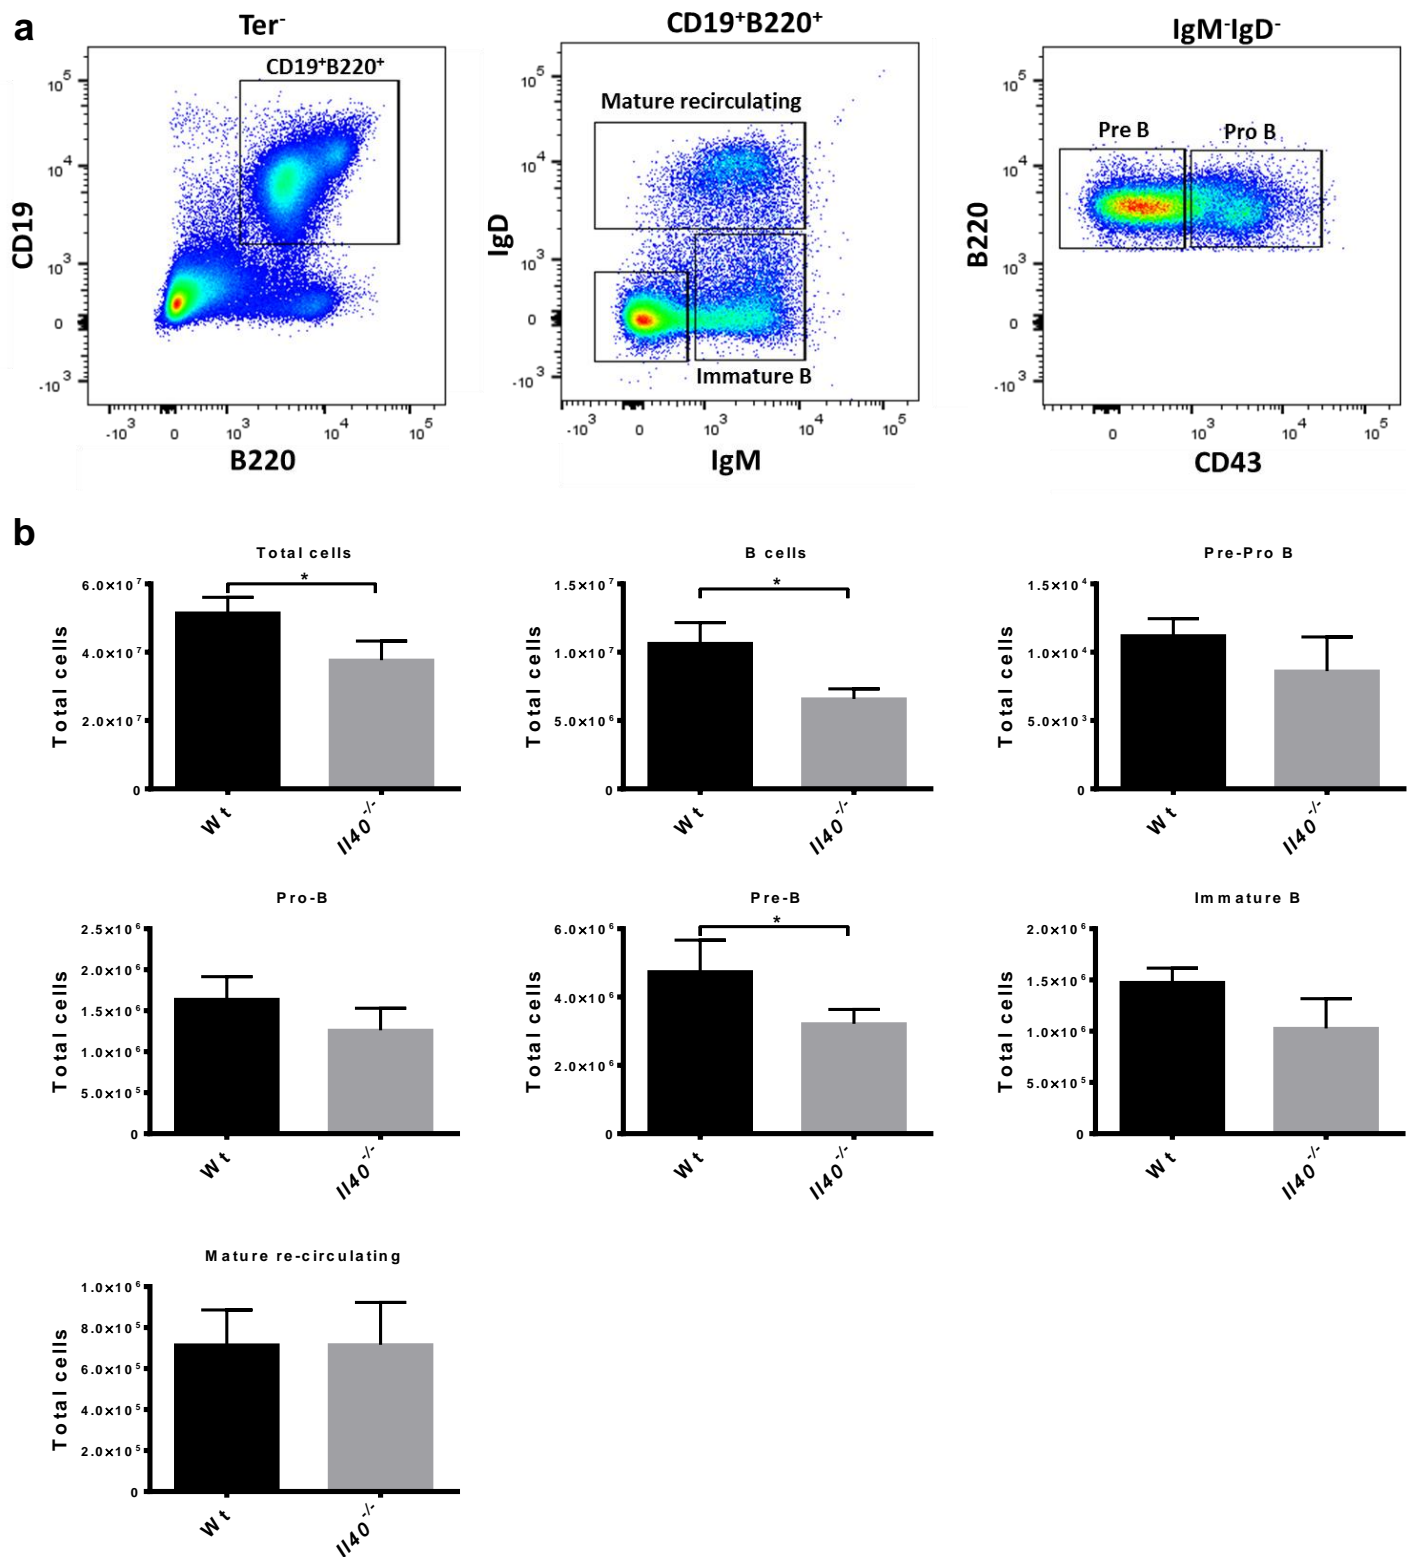

**Supplementary Figure S2.** B cell populations are reduced in the *Il40*<sup>-/-</sup> mouse (a) Gating strategy for analyses of B cell populations in the bone marrow. (b) Total number of cells and B cell populations in the bone marrow of WT and *Il40*<sup>-/-</sup> mice. B cells (CD19<sup>+</sup>, B220<sup>+</sup>), Pre-Pro B cells (B220<sup>+</sup>, IL7R<sup>+</sup>, Flk2<sup>+</sup>, Ly6D<sup>+</sup>), Pro-B (CD19<sup>+</sup>, B220<sup>+</sup>, IgM<sup>-</sup>, IgD<sup>-</sup>, CD43<sup>+</sup>), Pre-B (CD19<sup>+</sup>, B220<sup>+</sup>, IgM<sup>-</sup>, IgD<sup>-</sup>, CD43<sup>-</sup>), Immature B cells (CD19<sup>+</sup>, B220<sup>+</sup>, IgM<sup>+</sup>, IgD<sup>-</sup>), and mature recirculating B cells (CD19<sup>+</sup>, B220<sup>+</sup>, IgM<sup>+</sup>, IgD<sup>+</sup>). Bars represent mean  $\pm$  SEM, n=4 per group, \*P<0.05. Representative of two independent experiments.

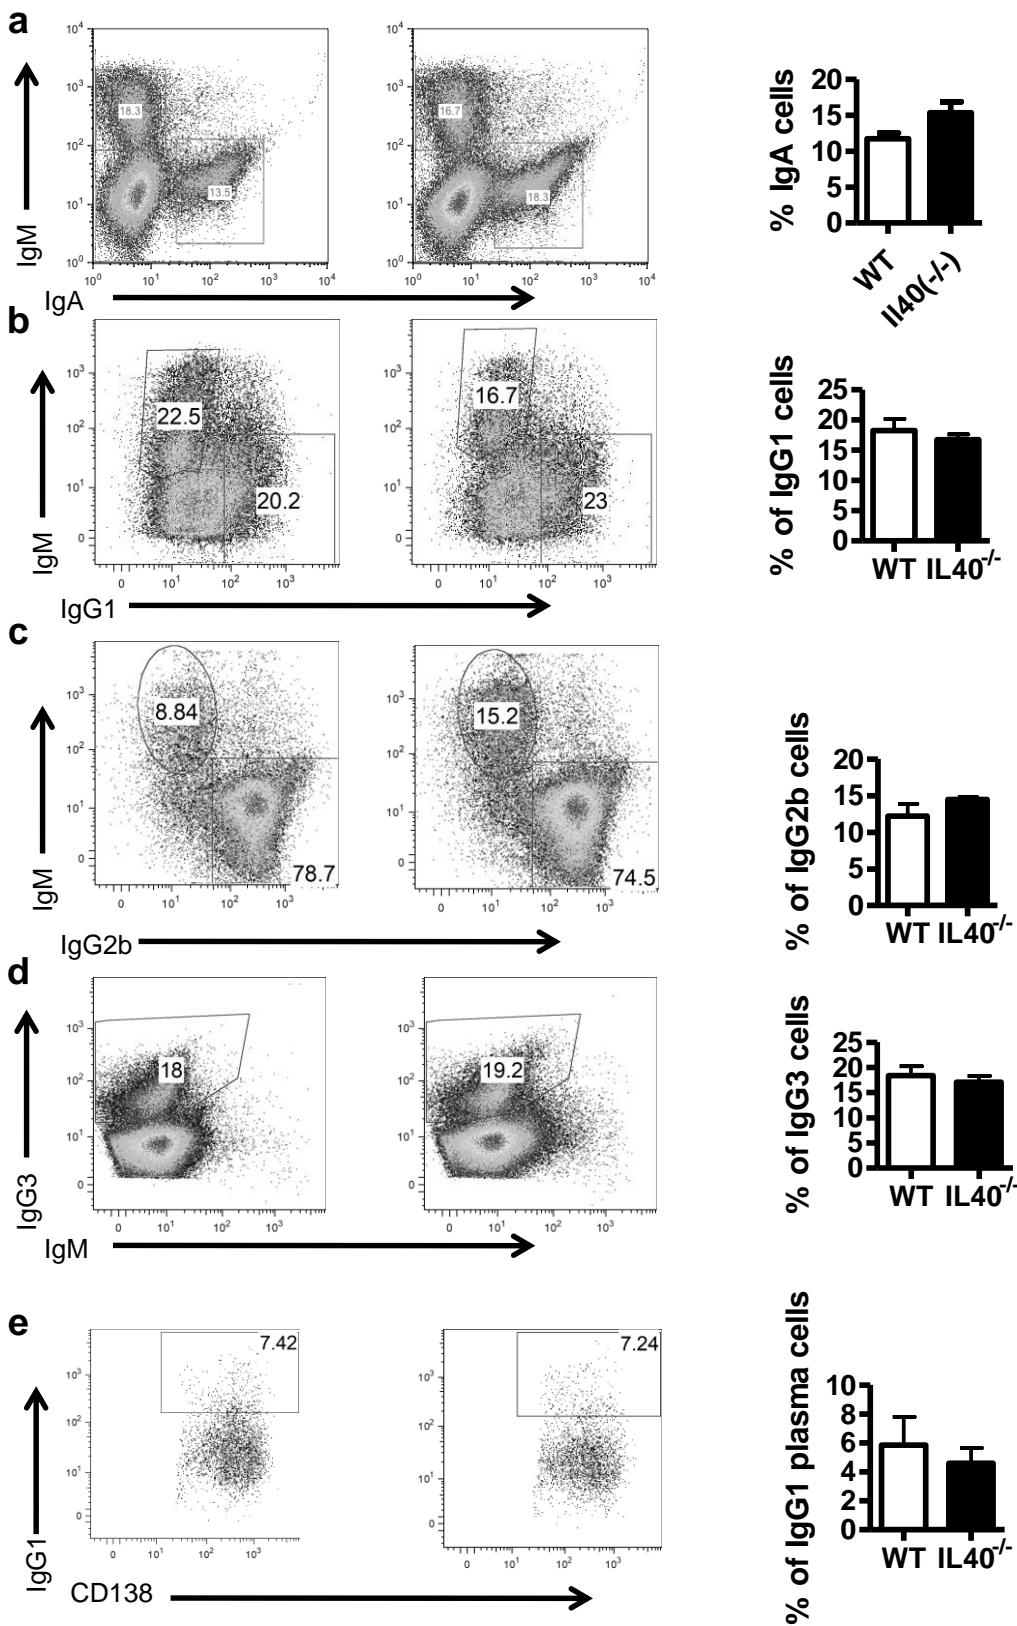

**Supplementary Figure S3.** B cells from IL-4 wt and IL-4<sup>-/-</sup> mice were measured by in vitro stimulation and flow cytometry assays for their relative ability to undergo CSR to the indicated isotypes and plasmablast/plasma cell differentiation. B cells were stimulated for 4 days with LPS and the following cytokines inducing isotype-specific CSR: IL-4, IL-5, TGF $\beta$  and anti-IgD/dextran for IgA (a), IL-4 for CSR to IgG1 (b); TGF $\beta$  anti-IgD/dextran for CSR to IgG2b (c); LPS alone to induce IgG3 (d). B cells stimulated with LPS and IL-4 for 4 days were measured by flow cytometry for the percentage of IgG1 + CD 138<sup>+</sup> class-switched plasmablasts/plasma cells (E). Panels on the right of each set of plots indicate results from triplicate experiments.

**Table S1. List of primers used for qRT-PCR**

| <b>Human</b>  |                             |                            |                        |
|---------------|-----------------------------|----------------------------|------------------------|
| <b>Gene</b>   | <b>Forward Sequence</b>     | <b>Reverse Sequence</b>    | <b>UPL<sup>a</sup></b> |
| C17orf99      | 5'-ACGGTTCATTCTACATGGCTG-3' | 5'-CCGAGGCATGGGCTCCCTG-3'  | 64                     |
| CD19          | 5'-TCCACCTGGAGATCACTGCT-3'  | 5'-GACCTTCCAGCCACCAGTC-3'  | 66                     |
| GAPDH         | 5'-AGCCACATCGCTCAGACAC-3'   | 5'-GCCCAATACGACCAAATCC-3'  | 60                     |
| <b>Mouse</b>  |                             |                            |                        |
| <b>Gene</b>   | <b>Forward Sequence</b>     | <b>Reverse Sequence</b>    | <b>UPL<sup>a</sup></b> |
| 6030468B19Rik | 5'-GCCTGCAGCTGAGACACTG-3'   | 5'-GCACCTATGGACCCAGCA-3'   | 50                     |
| CD19          | 5'-AAGGTCATTGCAAGGTCAGC-3'  | 5'-CTGGGACTATAAATCCACCA-3' | 21                     |
| GAPDH         | 5'-TTTGATGTTAGTGGGGTCTCG-3' | 5'-AGTTTGTCATCAACGGGAAG-3' | 9                      |

<sup>a</sup>Universal Probe Library, Roche, Switzerland
